# Supplementary material for: Causal association of epigenetic aging and COVID-19 severity and susceptibility: A bidirectional Mendelian randomization study
Source: PubMed Central journal article supplement (PMC9538153; doi:10.3389/fmed.2022.989950), 2022-09-23
Supplement: Data_Sheet_1.pdf [file Data_Sheet_1.pdf]

## Causal association of aging and COVID-19 severity and susceptibility a bidirectional Mendelian randomization study

### Supplementary Material.

This supplement contains 3 supplemental tables and 8 supplemental figure.

**Supplementary Table 1.** Epigenetic age instrumental variables and R<sup>2</sup> and F statistics

| Exposure   | SNP         | EA | OA | EAF  | Beta  | Se   | P value  | R <sup>2</sup> | R <sup>2</sup> combined | F         |
|------------|-------------|----|----|------|-------|------|----------|----------------|-------------------------|-----------|
| PhenoAge   | rs1142345   | T  | C  | 0.95 | 0.82  | 0.09 | 3.35E-21 | 0.0002659      | 0.00437                 | 152.18959 |
| PhenoAge   | rs7228835   | C  | G  | 0.12 | -0.51 | 0.06 | 3.30E-17 | 0.000438       |                         |           |
| PhenoAge   | rs678553    | T  | C  | 0.69 | 0.33  | 0.04 | 2.27E-15 | 0.0007751      |                         |           |
| PhenoAge   | rs3829957   | T  | C  | 0.20 | -0.38 | 0.05 | 3.51E-15 | 0.0005662      |                         |           |
| PhenoAge   | rs752223    | A  | G  | 0.08 | -0.56 | 0.07 | 7.20E-15 | 0.000262       |                         |           |
| PhenoAge   | rs1990053   | A  | G  | 0.42 | 0.26  | 0.04 | 2.05E-11 | 0.0006314      |                         |           |
| PhenoAge   | rs11190127  | A  | C  | 0.38 | 0.25  | 0.04 | 3.83E-10 | 0.0005307      |                         |           |
| PhenoAge   | rs6531114   | T  | C  | 0.26 | -0.25 | 0.04 | 2.07E-09 | 0.0004017      |                         |           |
| PhenoAge   | rs11253338  | T  | C  | 0.18 | 0.28  | 0.05 | 8.49E-09 | 0.0002871      |                         |           |
| PhenoAge   | rs116853700 | A  | G  | 0.04 | 0.55  | 0.10 | 1.59E-08 | 7.492E-05      |                         |           |
| PhenoAge   | rs73028070  | A  | G  | 0.08 | -0.43 | 0.08 | 1.74E-08 | 0.0001326      |                         |           |
| GrimAge    | rs9386796   | T  | C  | 0.46 | 0.20  | 0.03 | 1.64E-11 | 0.0006511      | 0.00202                 | 70.34253  |
| GrimAge    | rs887466    | A  | G  | 0.38 | -0.19 | 0.03 | 5.09E-10 | 0.0005259      |                         |           |
| GrimAge    | rs4065321   | T  | C  | 0.53 | -0.17 | 0.03 | 8.78E-09 | 0.0004747      |                         |           |
| GrimAge    | rs17094148  | A  | G  | 0.71 | -0.18 | 0.03 | 2.55E-08 | 0.0003709      |                         |           |
| Hannum     | rs10786282  | A  | G  | 0.21 | -0.36 | 0.04 | 2.61E-23 | 0.0009533      | 0.00446                 | 155.42771 |
| Hannum     | rs1005277   | A  | C  | 0.30 | 0.30  | 0.03 | 8.92E-20 | 0.0010006      |                         |           |
| Hannum     | rs12417758  | T  | C  | 0.55 | -0.21 | 0.03 | 6.22E-12 | 0.000677       |                         |           |
| Hannum     | rs1598856   | A  | G  | 0.45 | 0.19  | 0.03 | 3.63E-10 | 0.0005617      |                         |           |
| Hannum     | rs3093956   | T  | C  | 0.81 | -0.24 | 0.04 | 8.39E-10 | 0.0003277      |                         |           |
| Hannum     | rs4383328   | A  | T  | 0.28 | -0.19 | 0.03 | 9.57E-09 | 0.0003869      |                         |           |
| Hannum     | rs111731678 | A  | T  | 0.19 | -0.23 | 0.04 | 1.26E-08 | 0.0002919      |                         |           |
| Hannum     | rs4838595   | T  | C  | 0.12 | -0.26 | 0.05 | 1.29E-08 | 0.0001992      |                         |           |
| Hannum     | rs34970912  | C  | G  | 0.96 | -0.52 | 0.09 | 2.88E-08 | 6.031E-05      |                         |           |
| HorvathAge | rs10949481  | A  | T  | 0.95 | 1.08  | 0.07 | 4.56E-54 | 0.0006958      | 0.01259                 | 442.37803 |
| HorvathAge | rs3917672   | A  | G  | 0.49 | -0.26 | 0.03 | 5.95E-18 | 0.0010707      | 0.01260                 |           |
| HorvathAge | rs57941717  | T  | G  | 0.25 | 0.29  | 0.04 | 3.71E-16 | 0.0007222      |                         |           |
| HorvathAge | rs10447389  | A  | G  | 0.27 | -0.28 | 0.03 | 4.42E-16 | 0.0007483      |                         |           |
| HorvathAge | rs6414374   | A  | G  | 0.16 | 0.32  | 0.04 | 1.42E-14 | 0.0004636      |                         |           |
| HorvathAge | rs4240228   | T  | G  | 0.72 | 0.25  | 0.03 | 2.47E-14 | 0.0006802      |                         |           |
| HorvathAge | rs10732882  | T  | G  | 0.41 | -0.24 | 0.03 | 3.68E-14 | 0.0007947      |                         |           |
| HorvathAge | rs7550821   | T  | C  | 0.24 | -0.26 | 0.04 | 3.27E-13 | 0.0005648      |                         |           |
| HorvathAge | rs7627756   | A  | G  | 0.56 | 0.22  | 0.03 | 6.28E-13 | 0.0007319      |                         |           |
| HorvathAge | rs1511762   | T  | C  | 0.22 | 0.26  | 0.04 | 1.53E-12 | 0.0004912      |                         |           |
| HorvathAge | rs2736099   | A  | G  | 0.35 | 0.23  | 0.03 | 3.47E-12 | 0.0006389      |                         |           |

|            |             |   |   |      |       |      |          |           |
|------------|-------------|---|---|------|-------|------|----------|-----------|
| HorvathAge | rs12043492  | T | C | 0.42 | 0.22  | 0.03 | 4.35E-12 | 0.0006727 |
| HorvathAge | rs75243280  | T | C | 0.67 | -0.23 | 0.03 | 7.37E-12 | 0.0005995 |
| HorvathAge | rs2492286   | T | G | 0.15 | 0.28  | 0.04 | 5.29E-11 | 0.0003195 |
| HorvathAge | rs6577536   | A | G | 0.48 | 0.20  | 0.03 | 6.73E-11 | 0.0006111 |
| HorvathAge | rs79111787  | T | C | 0.97 | -0.91 | 0.14 | 1.28E-10 | 7.419E-05 |
| HorvathAge | rs12903325  | T | G | 0.76 | -0.22 | 0.04 | 5.48E-10 | 0.0004054 |
| HorvathAge | rs1726672   | T | C | 0.30 | -0.20 | 0.03 | 6.05E-10 | 0.0004675 |
| HorvathAge | rs144317085 | A | T | 0.96 | 0.51  | 0.08 | 6.42E-10 | 8.209E-05 |
| HorvathAge | rs10735418  | T | C | 0.63 | 0.20  | 0.03 | 1.14E-09 | 0.0004989 |
| HorvathAge | rs1488106   | T | C | 0.37 | 0.18  | 0.03 | 4.25E-09 | 0.0004646 |
| HorvathAge | rs12666349  | T | C | 0.80 | 0.25  | 0.04 | 5.23E-09 | 0.0003115 |
| HorvathAge | rs2275558   | A | G | 0.22 | -0.23 | 0.04 | 6.44E-09 | 0.0003349 |
| HorvathAge | rs34003787  | T | C | 0.09 | 0.32  | 0.06 | 2.54E-08 | 0.0001411 |

---

\*SNP: Single Nucleotide Polymorphism; EA: Effect Allele; OA: Other Allele; EAF: Effector Allele Frequency; Beta: SNP effect size on exposure; Se: standard error; P: P-value; R<sup>2</sup> indicates the extent to which instrumental variables explain exposure (coefficient of determination of the regression equation); R<sup>2</sup> combined: Sum of R<sup>2</sup> of all SNPs; F: F-statistic

**Supplementary Table 2.** Telomere length instrumental variables and R<sup>2</sup> and F statistics

| Exposure        | SNP         | EA        | OA        | EAF  | Beta  | Se   | P value   | R <sup>2</sup> | R <sup>2</sup> combined | F     |
|-----------------|-------------|-----------|-----------|------|-------|------|-----------|----------------|-------------------------|-------|
| telomere length | rs3767952   | A         | G         | 0.23 | 0.01  | 0.00 | 1.80E-08  | 2.35E-05       | 0.01181                 | 36.63 |
| telomere length | rs4498805   | T         | G         | 0.55 | 0.02  | 0.00 | 5.70E-14  | 5.93E-05       |                         |       |
| telomere length | rs932002    | T         | C         | 0.15 | -0.04 | 0.00 | 7.30E-47  | 1.12E-04       |                         |       |
| telomere length | rs66731853  | A         | G         | 0.32 | -0.02 | 0.00 | 1.50E-16  | 6.25E-05       |                         |       |
| telomere length | rs11584821  | T         | C         | 0.18 | -0.03 | 0.00 | 3.00E-31  | 8.31E-05       |                         |       |
| telomere length | rs6659669   | T         | C         | 0.61 | -0.01 | 0.00 | 1.10E-08  | 3.30E-05       |                         |       |
| telomere length | rs2977608   | C         | A         | 0.74 | 0.01  | 0.00 | 3.00E-08  | 2.48E-05       |                         |       |
| telomere length | rs6669563   | A         | G         | 0.44 | 0.02  | 0.00 | 2.10E-19  | 8.46E-05       |                         |       |
| telomere length | rs145114957 | G         | C         | 0.04 | 0.03  | 0.00 | 4.60E-08  | 5.16E-06       |                         |       |
| telomere length | rs41269079  | A         | T         | 0.19 | 0.02  | 0.00 | 1.70E-09  | 2.36E-05       |                         |       |
| telomere length | rs139795227 | C         | A         | 0.01 | 0.06  | 0.01 | 6.70E-12  | 2.76E-06       |                         |       |
| telomere length | rs11579626  | C         | A         | 0.08 | 0.03  | 0.00 | 1.30E-13  | 1.81E-05       |                         |       |
| telomere length | rs6587577   | G         | A         | 0.83 | -0.02 | 0.00 | 4.80E-12  | 2.90E-05       |                         |       |
| telomere length | rs6751209   | C         | T         | 0.20 | -0.01 | 0.00 | 1.60E-08  | 2.20E-05       |                         |       |
| telomere length | rs188918174 | T         | C         | 0.04 | 0.04  | 0.01 | 1.20E-13  | 8.10E-06       |                         |       |
| telomere length | rs202034370 | T         | TA        | 0.98 | 0.10  | 0.01 | 2.60E-56  | 2.54E-05       |                         |       |
| telomere length | rs56178008  | A         | T         | 0.44 | 0.01  | 0.00 | 9.70E-13  | 5.31E-05       |                         |       |
| telomere length | rs376641875 | C         | CAT<br>AA | 0.93 | -0.03 | 0.00 | 3.30E-10  | 1.11E-05       |                         |       |
| telomere length | rs17803849  | T         | C         | 0.41 | 0.03  | 0.00 | 4.20E-41  | 1.84E-04       |                         |       |
| telomere length | rs2555104   | C         | A         | 0.43 | -0.01 | 0.00 | 6.60E-12  | 4.91E-05       |                         |       |
| telomere length | rs77732866  | A         | G         | 0.14 | 0.02  | 0.00 | 9.20E-10  | 1.88E-05       |                         |       |
| telomere length | rs2230590   | C         | T         | 0.51 | -0.02 | 0.00 | 3.60E-15  | 6.55E-05       |                         |       |
| telomere length | rs78491606  | C         | A         | 0.02 | -0.08 | 0.01 | 1.90E-24  | 7.98E-06       |                         |       |
| telomere length | rs9878436   | T         | C         | 0.43 | -0.01 | 0.00 | 1.20E-12  | 5.25E-05       |                         |       |
| telomere length | rs35446936  | A         | G         | 0.24 | -0.09 | 0.00 | 1.00E-200 | 1.27E-03       |                         |       |
| telomere length | rs112394943 | C         | T         | 0.16 | -0.02 | 0.00 | 1.60E-12  | 2.88E-05       |                         |       |
| telomere length | rs13062095  | C         | T         | 0.33 | 0.01  | 0.00 | 9.70E-11  | 3.91E-05       |                         |       |
| telomere length | rs4616688   | T         | G         | 0.53 | -0.02 | 0.00 | 4.50E-18  | 7.93E-05       |                         |       |
| telomere length | rs6790988   | G         | A         | 0.74 | 0.01  | 0.00 | 1.80E-10  | 3.30E-05       |                         |       |
| telomere length | rs869785    | C         | T         | 0.67 | -0.01 | 0.00 | 4.40E-12  | 4.47E-05       |                         |       |
| telomere length | rs6776756   | A         | G         | 0.60 | -0.02 | 0.00 | 1.10E-17  | 7.47E-05       |                         |       |
| telomere length | rs11426156  | T         | TA        | 0.40 | -0.01 | 0.00 | 2.20E-08  | 3.18E-05       |                         |       |
| telomere length | rs35500378  | CAC<br>TT | C         | 0.61 | 0.01  | 0.00 | 2.00E-12  | 4.99E-05       |                         |       |
| telomere length | rs10805346  | C         | T         | 0.44 | 0.01  | 0.00 | 7.00E-09  | 3.50E-05       |                         |       |
| telomere length | rs6536702   | A         | G         | 0.77 | 0.05  | 0.00 | 9.40E-111 | 3.70E-04       |                         |       |
| telomere length | rs871134    | T         | C         | 0.57 | -0.02 | 0.00 | 1.70E-19  | 8.47E-05       |                         |       |
| telomere length | rs4695407   | G         | A         | 0.51 | 0.01  | 0.00 | 1.50E-12  | 5.30E-05       |                         |       |
| telomere length | rs2282764   | G         | A         | 0.14 | -0.02 | 0.00 | 9.30E-15  | 3.11E-05       |                         |       |
| telomere length | rs7705526   | A         | C         | 0.33 | 0.08  | 0.00 | 1.00E-200 | 1.20E-03       |                         |       |
| telomere length | rs73730598  | A         | G         | 0.05 | 0.03  | 0.00 | 4.70E-10  | 8.51E-06       |                         |       |

|                 |             |            |   |      |       |      |           |          |
|-----------------|-------------|------------|---|------|-------|------|-----------|----------|
| telomere length | rs61748181  | T          | C | 0.03 | -0.06 | 0.01 | 2.80E-23  | 1.18E-05 |
| telomere length | rs6881568   | A          | C | 0.36 | 0.02  | 0.00 | 3.70E-16  | 6.50E-05 |
| telomere length | rs55747751  | A          | G | 0.08 | -0.02 | 0.00 | 1.70E-08  | 9.62E-06 |
| telomere length | rs185174247 | A          | G | 0.06 | 0.04  | 0.00 | 1.10E-17  | 1.65E-05 |
| telomere length | rs141214782 | TTA<br>TC  | T | 0.10 | -0.02 | 0.00 | 2.00E-13  | 2.08E-05 |
| telomere length | rs28363070  | A          | G | 0.01 | 0.08  | 0.01 | 3.50E-15  | 3.47E-06 |
| telomere length | rs1611236   | A          | G | 0.33 | -0.02 | 0.00 | 6.10E-14  | 5.25E-05 |
| telomere length | rs142730696 | TTT<br>TTC | T | 0.86 | 0.02  | 0.00 | 6.30E-13  | 2.57E-05 |
| telomere length | rs7772289   | T          | G | 0.50 | 0.02  | 0.00 | 1.70E-18  | 8.15E-05 |
| telomere length | rs2763979   | T          | C | 0.36 | -0.03 | 0.00 | 1.30E-40  | 1.74E-04 |
| telomere length | rs80324517  | A          | G | 0.05 | 0.04  | 0.00 | 1.80E-17  | 1.41E-05 |
| telomere length | rs201558190 | C          | T | 0.36 | -0.02 | 0.00 | 6.40E-17  | 6.84E-05 |
| telomere length | rs9398196   | G          | A | 0.52 | -0.01 | 0.00 | 9.50E-13  | 5.39E-05 |
| telomere length | rs61405042  | T          | C | 0.03 | -0.05 | 0.01 | 8.50E-17  | 8.34E-06 |
| telomere length | rs2538745   | C          | T | 0.60 | -0.01 | 0.00 | 3.10E-10  | 4.02E-05 |
| telomere length | rs117407747 | T          | C | 0.03 | 0.05  | 0.01 | 1.80E-13  | 6.16E-06 |
| telomere length | rs1985369   | G          | A | 0.87 | -0.03 | 0.00 | 3.60E-25  | 5.21E-05 |
| telomere length | rs13230646  | C          | T | 0.25 | -0.02 | 0.00 | 8.90E-14  | 4.40E-05 |
| telomere length | rs11769630  | A          | T | 0.07 | -0.03 | 0.00 | 4.30E-11  | 1.23E-05 |
| telomere length | rs2056726   | A          | G | 0.21 | -0.02 | 0.00 | 7.90E-21  | 6.25E-05 |
| telomere length | rs7790856   | T          | C | 0.29 | -0.04 | 0.00 | 1.80E-87  | 3.42E-04 |
| telomere length | rs4731541   | G          | C | 0.62 | -0.02 | 0.00 | 1.40E-23  | 9.94E-05 |
| telomere length | rs117630647 | A          | G | 0.02 | 0.06  | 0.01 | 1.40E-16  | 6.05E-06 |
| telomere length | rs2306646   | C          | G | 0.56 | -0.02 | 0.00 | 3.30E-25  | 1.12E-04 |
| telomere length | rs762679    | A          | T | 0.86 | 0.03  | 0.00 | 1.40E-27  | 6.16E-05 |
| telomere length | rs11991877  | A          | T | 0.89 | -0.03 | 0.00 | 3.20E-21  | 3.73E-05 |
| telomere length | rs10112752  | A          | G | 0.43 | -0.03 | 0.00 | 9.50E-46  | 2.09E-04 |
| telomere length | rs1023767   | A          | G | 0.24 | -0.02 | 0.00 | 5.00E-15  | 4.70E-05 |
| telomere length | rs34896435  | G          | C | 0.47 | 0.02  | 0.00 | 6.40E-14  | 5.93E-05 |
| telomere length | rs11557154  | T          | C | 0.13 | -0.03 | 0.00 | 1.10E-30  | 6.35E-05 |
| telomere length | rs4743037   | T          | C | 0.23 | 0.01  | 0.00 | 5.10E-10  | 2.91E-05 |
| telomere length | rs117034449 | A          | G | 0.02 | 0.04  | 0.01 | 2.10E-08  | 3.03E-06 |
| telomere length | rs7099229   | A          | G | 0.27 | -0.02 | 0.00 | 8.40E-12  | 3.93E-05 |
| telomere length | rs12412214  | A          | G | 0.28 | -0.02 | 0.00 | 3.40E-28  | 1.03E-04 |
| telomere length | rs6584579   | G          | A | 0.40 | 0.01  | 0.00 | 2.00E-08  | 3.20E-05 |
| telomere length | rs9419958   | C          | T | 0.86 | -0.08 | 0.00 | 2.60E-167 | 3.84E-04 |
| telomere length | rs77231040  | C          | G | 0.01 | 0.10  | 0.01 | 2.00E-13  | 1.31E-06 |
| telomere length | rs10905255  | T          | G | 0.58 | -0.02 | 0.00 | 2.60E-19  | 8.34E-05 |
| telomere length | rs939916    | A          | G | 0.67 | 0.02  | 0.00 | 6.60E-29  | 1.17E-04 |
| telomere length | rs10840270  | G          | C | 0.66 | 0.01  | 0.00 | 1.30E-11  | 4.38E-05 |
| telomere length | rs2293579   | A          | G | 0.39 | -0.01 | 0.00 | 3.30E-10  | 3.97E-05 |
| telomere length | rs10768683  | G          | C | 0.84 | 0.05  | 0.00 | 1.50E-64  | 1.63E-04 |

|                 |             |   |    |      |       |      |          |          |
|-----------------|-------------|---|----|------|-------|------|----------|----------|
| telomere length | rs11212631  | C | T  | 0.20 | -0.02 | 0.00 | 4.70E-14 | 3.84E-05 |
| telomere length | rs6590343   | G | A  | 0.52 | 0.01  | 0.00 | 1.50E-09 | 3.86E-05 |
| telomere length | rs611646    | A | T  | 0.41 | -0.04 | 0.00 | 3.50E-73 | 3.35E-04 |
| telomere length | rs12369950  | C | T  | 0.14 | -0.02 | 0.00 | 8.00E-10 | 1.93E-05 |
| telomere length | rs79977579  | A | C  | 0.10 | 0.03  | 0.00 | 2.30E-16 | 2.46E-05 |
| telomere length | rs10773176  | G | A  | 0.74 | -0.02 | 0.00 | 5.20E-14 | 4.60E-05 |
| telomere length | rs10845387  | A | G  | 0.35 | -0.01 | 0.00 | 1.50E-11 | 4.40E-05 |
| telomere length | rs17445108  | A | G  | 0.13 | -0.02 | 0.00 | 2.00E-08 | 1.48E-05 |
| telomere length | rs10774624  | A | G  | 0.53 | 0.01  | 0.00 | 2.90E-13 | 5.61E-05 |
| telomere length | rs1907702   | A | G  | 0.77 | 0.02  | 0.00 | 5.90E-10 | 2.90E-05 |
| telomere length | rs76666449  | C | T  | 0.10 | 0.03  | 0.00 | 8.20E-19 | 3.01E-05 |
| telomere length | rs28577594  | C | G  | 0.71 | 0.02  | 0.00 | 5.40E-17 | 6.12E-05 |
| telomere length | rs1332941   | G | A  | 0.82 | 0.03  | 0.00 | 5.90E-21 | 5.50E-05 |
| telomere length | rs670180    | A | T  | 0.57 | -0.01 | 0.00 | 1.20E-08 | 3.38E-05 |
| telomere length | rs9600019   | T | C  | 0.34 | 0.01  | 0.00 | 2.40E-09 | 3.36E-05 |
| telomere length | rs73581419  | T | C  | 0.11 | 0.02  | 0.00 | 1.30E-12 | 2.03E-05 |
| telomere length | rs113525195 | A | C  | 0.29 | -0.01 | 0.00 | 3.10E-08 | 2.67E-05 |
| telomere length | rs45604339  | T | C  | 0.34 | -0.02 | 0.00 | 4.30E-22 | 8.91E-05 |
| telomere length | rs137901416 | A | G  | 0.10 | 0.05  | 0.00 | 4.70E-43 | 7.23E-05 |
| telomere length | rs1957937   | T | A  | 0.16 | 0.02  | 0.00 | 1.90E-14 | 3.34E-05 |
| telomere length | rs3093888   | A | G  | 0.05 | -0.03 | 0.00 | 1.50E-10 | 8.45E-06 |
| telomere length | rs34550383  | C | CT | 0.55 | -0.02 | 0.00 | 8.60E-22 | 9.66E-05 |
| telomere length | rs17677991  | G | C  | 0.34 | 0.02  | 0.00 | 4.40E-26 | 1.06E-04 |
| telomere length | rs5742915   | C | T  | 0.45 | 0.02  | 0.00 | 1.60E-21 | 9.51E-05 |
| telomere length | rs7164950   | G | A  | 0.41 | 0.01  | 0.00 | 2.30E-10 | 4.11E-05 |
| telomere length | rs11412296  | T | TA | 0.76 | 0.03  | 0.00 | 1.40E-45 | 1.55E-04 |
| telomere length | rs80116508  | A | G  | 0.06 | -0.04 | 0.00 | 2.00E-17 | 1.79E-05 |
| telomere length | rs76219171  | A | G  | 0.06 | 0.04  | 0.00 | 7.80E-17 | 1.62E-05 |
| telomere length | rs2967355   | C | A  | 0.77 | -0.05 | 0.00 | 4.00E-83 | 2.76E-04 |
| telomere length | rs12925933  | C | A  | 0.66 | -0.01 | 0.00 | 7.00E-12 | 4.46E-05 |
| telomere length | rs111950327 | C | G  | 0.06 | 0.02  | 0.00 | 5.90E-09 | 8.55E-06 |
| telomere length | rs450962    | G | A  | 0.28 | 0.01  | 0.00 | 5.90E-09 | 2.92E-05 |
| telomere length | rs3785074   | G | A  | 0.29 | 0.02  | 0.00 | 2.60E-27 | 1.02E-04 |
| telomere length | rs76065543  | T | C  | 0.14 | 0.03  | 0.00 | 4.20E-32 | 6.99E-05 |
| telomere length | rs12932179  | G | A  | 0.56 | -0.01 | 0.00 | 1.80E-11 | 4.71E-05 |
| telomere length | rs182059586 | C | T  | 0.03 | -0.06 | 0.01 | 4.90E-17 | 7.30E-06 |
| telomere length | rs11117354  | C | T  | 0.70 | 0.02  | 0.00 | 3.40E-26 | 1.00E-04 |
| telomere length | rs9940099   | T | G  | 0.06 | -0.03 | 0.00 | 3.20E-16 | 1.66E-05 |
| telomere length | rs56061761  | A | G  | 0.33 | -0.02 | 0.00 | 6.90E-20 | 7.84E-05 |
| telomere length | rs4724      | A | G  | 0.12 | -0.05 | 0.00 | 9.80E-69 | 1.34E-04 |
| telomere length | rs12451892  | C | T  | 0.38 | -0.01 | 0.00 | 2.20E-08 | 3.13E-05 |
| telomere length | rs7209057   | A | G  | 0.56 | 0.01  | 0.00 | 5.70E-09 | 3.54E-05 |
| telomere length | rs59409453  | G | A  | 0.73 | 0.02  | 0.00 | 1.60E-18 | 6.43E-05 |
| telomere length | rs111527438 | C | T  | 0.35 | 0.01  | 0.00 | 3.10E-09 | 3.39E-05 |

|                 |             |   |     |      |       |      |           |          |
|-----------------|-------------|---|-----|------|-------|------|-----------|----------|
| telomere length | rs7221585   | T | C   | 0.22 | 0.01  | 0.00 | 6.70E-09  | 2.48E-05 |
| telomere length | rs75664430  | G | C   | 0.25 | -0.02 | 0.00 | 3.60E-24  | 8.13E-05 |
| telomere length | rs56799554  | G | A   | 0.17 | -0.03 | 0.00 | 3.00E-22  | 5.63E-05 |
| telomere length | rs144204502 | T | C   | 0.01 | -0.10 | 0.01 | 3.40E-28  | 6.37E-06 |
| telomere length | rs150150565 | T | C   | 0.02 | 0.06  | 0.01 | 6.80E-18  | 6.60E-06 |
| telomere length | rs116863223 | A | G   | 0.01 | -0.08 | 0.01 | 2.60E-18  | 3.75E-06 |
| telomere length | rs16978028  | T | A   | 0.14 | -0.03 | 0.00 | 8.20E-26  | 5.75E-05 |
| telomere length | rs2276182   | G | C   | 0.40 | 0.02  | 0.00 | 2.80E-30  | 1.33E-04 |
| telomere length | rs9955360   | A | C   | 0.87 | -0.02 | 0.00 | 2.20E-10  | 1.94E-05 |
| telomere length | rs3891167   | G | A   | 0.25 | -0.04 | 0.00 | 1.20E-70  | 2.53E-04 |
| telomere length | rs139669835 | T | C   | 0.01 | -0.06 | 0.01 | 6.10E-09  | 1.33E-06 |
| telomere length | rs11085072  | T | C   | 0.24 | -0.01 | 0.00 | 2.60E-08  | 2.37E-05 |
| telomere length | rs4530278   | T | G   | 0.60 | 0.01  | 0.00 | 1.50E-11  | 4.64E-05 |
| telomere length | rs8105767   | G | A   | 0.29 | 0.03  | 0.00 | 2.50E-50  | 1.96E-04 |
| telomere length | rs429358    | C | T   | 0.15 | 0.02  | 0.00 | 3.80E-10  | 2.16E-05 |
| telomere length | rs8102497   | A | G   | 0.43 | -0.01 | 0.00 | 1.40E-13  | 5.69E-05 |
| telomere length | rs11699829  | A | G   | 0.03 | 0.06  | 0.01 | 1.50E-26  | 1.59E-05 |
| telomere length | rs142426306 | T | C   | 0.04 | -0.05 | 0.01 | 8.70E-21  | 1.41E-05 |
| telomere length | rs1291143   | C | A   | 0.85 | 0.05  | 0.00 | 1.80E-69  | 1.69E-04 |
| telomere length | rs6054257   | A | G   | 0.79 | -0.01 | 0.00 | 1.10E-08  | 2.27E-05 |
| telomere length | rs35640778  | A | G   | 0.02 | -0.21 | 0.01 | 9.59E-195 | 7.63E-05 |
| telomere length | rs143190905 | T | G   | 0.08 | -0.07 | 0.00 | 1.60E-85  | 1.20E-04 |
| telomere length | rs41304832  | A | G   | 0.01 | 0.06  | 0.01 | 5.00E-11  | 2.24E-06 |
| telomere length | rs117512405 | A | G   | 0.02 | -0.08 | 0.01 | 9.50E-22  | 6.51E-06 |
| telomere length | rs28502153  | A | C   | 0.38 | -0.02 | 0.00 | 1.20E-25  | 1.09E-04 |
| telomere length | rs6007020   | C | T   | 0.37 | 0.01  | 0.00 | 4.80E-12  | 4.71E-05 |
|                 |             |   | TAA |      |       |      |           |          |
| telomere length | rs131797    | T | AA  | 0.24 | 0.02  | 0.00 | 6.80E-25  | 8.10E-05 |
|                 |             |   | A   |      |       |      |           |          |
| telomere length | rs1003322   | A | C   | 0.21 | 0.01  | 0.00 | 1.00E-08  | 2.33E-05 |

---

\*SNP: Single Nucleotide Polymorphism; EA: Effect Allele; OA: Other Allele; EAF: Effector Allele Frequency; Beta: SNP effect size on exposure; Se: standard error; P: P-value; R<sup>2</sup> indicates the extent to which instrumental variables explain exposure (coefficient of determination of the regression equation); R<sup>2</sup> combined: Sum of R<sup>2</sup> of all SNPs; F: F-statistic

**Supplementary Table 3.** COVID-19 susceptibility and severity instrumental variables and R<sup>2</sup>, F statistics

| Exposure       | SNP         | EA | OA | MAF  | Beta  | Se   | P value  | R <sup>2</sup> | R <sup>2</sup> combined | F     |
|----------------|-------------|----|----|------|-------|------|----------|----------------|-------------------------|-------|
| severity       | rs35081325  | A  | T  | 0.08 | 0.63  | 0.04 | 5.75E-45 | 1.99E-05       | 3.69E-05                | 51.20 |
| severity       | rs111837807 | T  | C  | 0.10 | 0.29  | 0.04 | 5.66E-12 | 6.13E-06       |                         |       |
| severity       | rs622568    | A  | C  | 0.15 | 0.23  | 0.04 | 1.04E-09 | 6.70E-06       |                         |       |
| severity       | rs2237698   | C  | T  | 0.09 | 0.24  | 0.04 | 2.41E-09 | 4.19E-06       |                         |       |
| susceptibility | rs4971066   | T  | G  | 0.18 | -0.08 | 0.01 | 1.02E-08 | 5.70E-06       | 5.61E-05                | 94.54 |
| susceptibility | rs2271616   | G  | T  | 0.12 | 0.16  | 0.02 | 3.61E-25 | 1.33E-05       |                         |       |
| susceptibility | rs17078348  | A  | G  | 0.10 | 0.09  | 0.02 | 1.20E-08 | 3.46E-06       |                         |       |
| susceptibility | rs10936744  | C  | T  | 0.36 | -0.06 | 0.01 | 3.51E-10 | 1.08E-05       |                         |       |
| susceptibility | rs579459    | C  | T  | 0.79 | -0.09 | 0.01 | 2.18E-16 | 1.33E-05       |                         |       |
| susceptibility | rs10744789  | T  | C  | 0.72 | 0.07  | 0.01 | 2.72E-10 | 9.65E-06       |                         |       |

\*SNP: Single Nucleotide Polymorphism; EA: Effect Allele; OA: Other Allele; **MAF: Minor Allele Frequency**; Beta: SNP effect size on exposure; Se: standard error; P: P-value; R<sup>2</sup> indicates the extent to which instrumental variables explain exposure (coefficient of determination of the regression equation); R<sup>2</sup> combined: Sum of R<sup>2</sup> of all SNPs; F: F-statistic

**Supplementary Figure 1.** OR estimates and 95% CI for five methods with epigenetic age as the exposure and COVID-19 susceptibility and severity as the outcome.

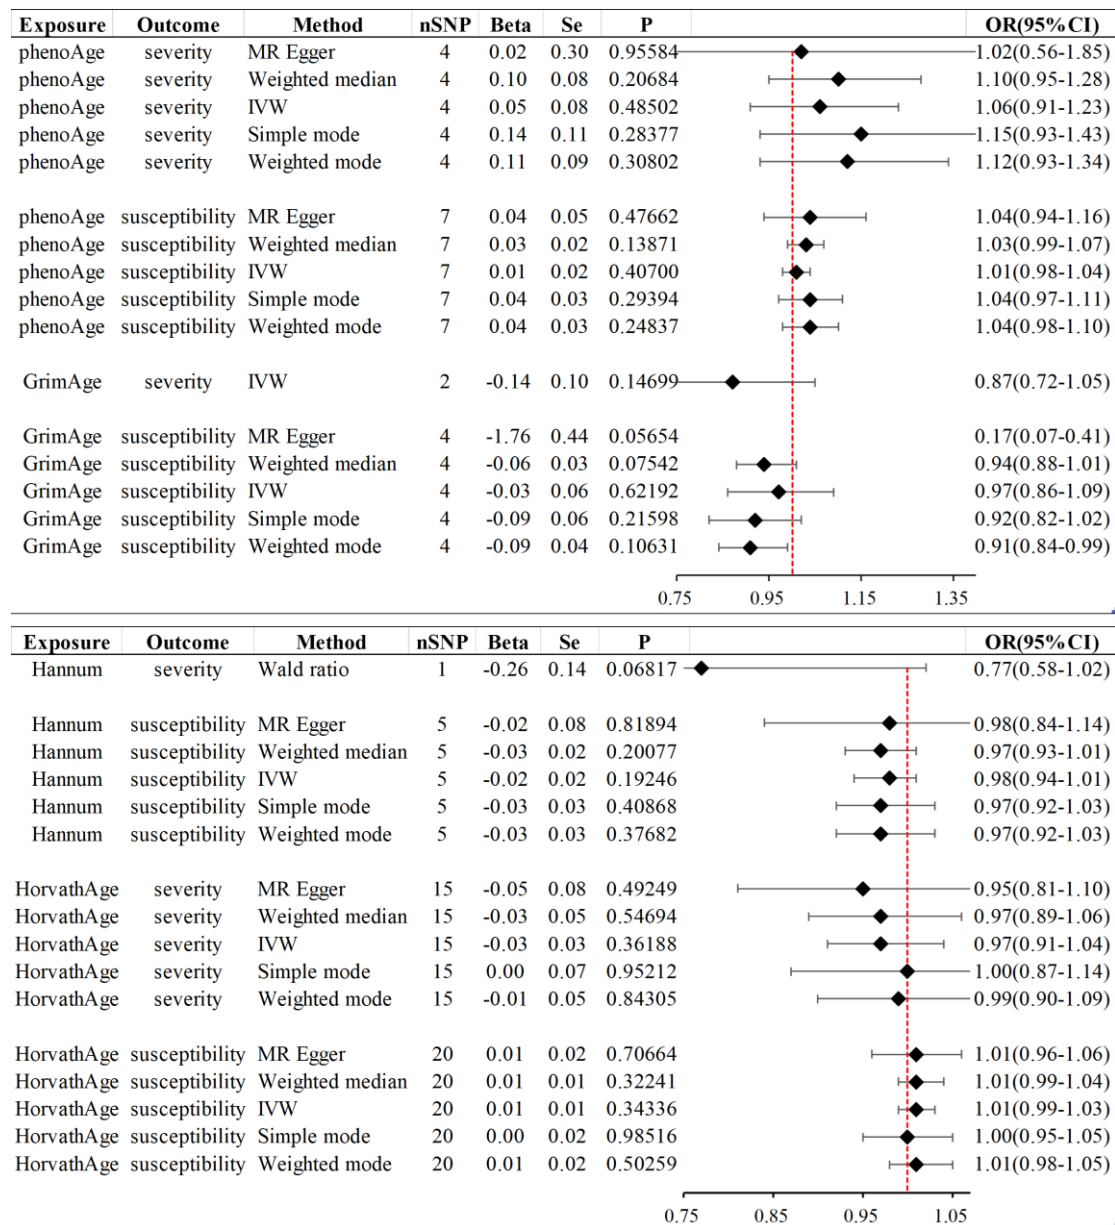

\*Methods: MR Egger、Weighted median、IVW、Simple mode、Weighted mode; Beta: risk index; Se: standard error; P: P-value; OR(95%CI):odds ratio(95%confidence interval); Forest plot: Visualize the causal effect of epigenetic age on the risk of COVID-19 susceptibility and severity by five methods(The standard line is the line of “X=1” (red dashed line))



**Supplementary Figure 2.** Mendelian randomization effects forest plots for individual SNPs with epigenetic age as the exposure, COVID-19 susceptibility and severity as the outcome

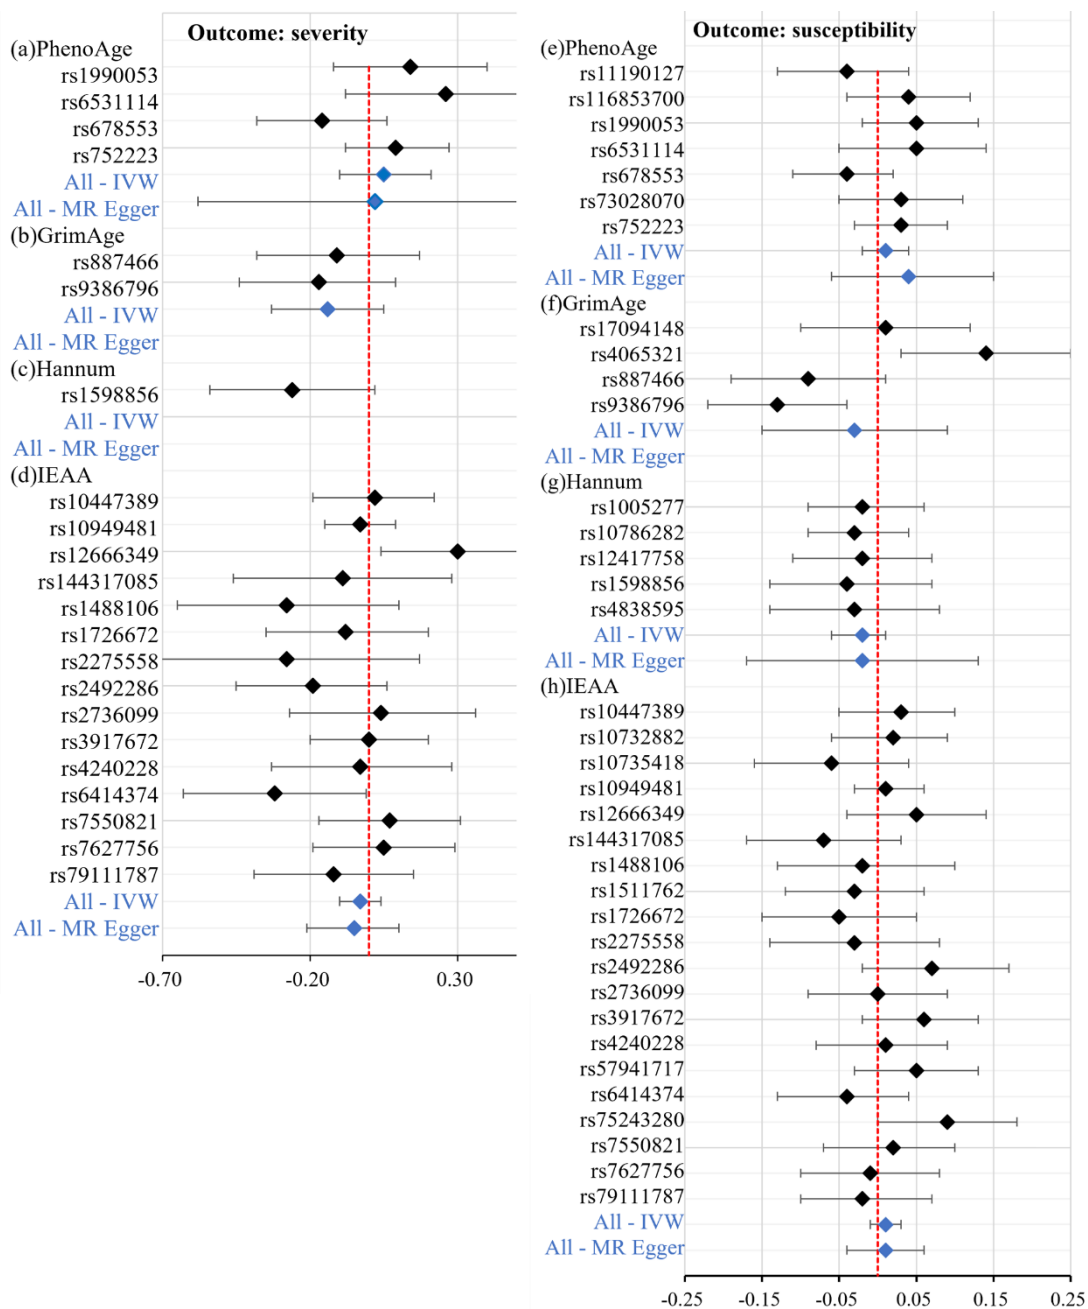

\* This figure showed the forest plots for individual SNPs with epigenetic age as the exposure, COVID-19 susceptibility and severity as the outcome. (a)exposure: PhenoAge, outcome: susceptibility; (b)exposure: GrimAge, outcome: susceptibility; (c)exposure: Hannum, outcome: susceptibility; (d)exposure: HorvathAge, outcome: susceptibility; (e)exposure: PhenoAge, outcome: severity; (f)exposure: GrimAge, outcome: severity; (g)exposure: HannumAge, outcome: severity; (h)exposure: HorvathAge, outcome: severity; The blue marker points indicated All-IVW and All-MR Egger

**Supplementary Figure 3.** OR estimates and 95% CI of the five methods with COVID-19 susceptibility and severity as the exposure and epigenetic age as the outcome

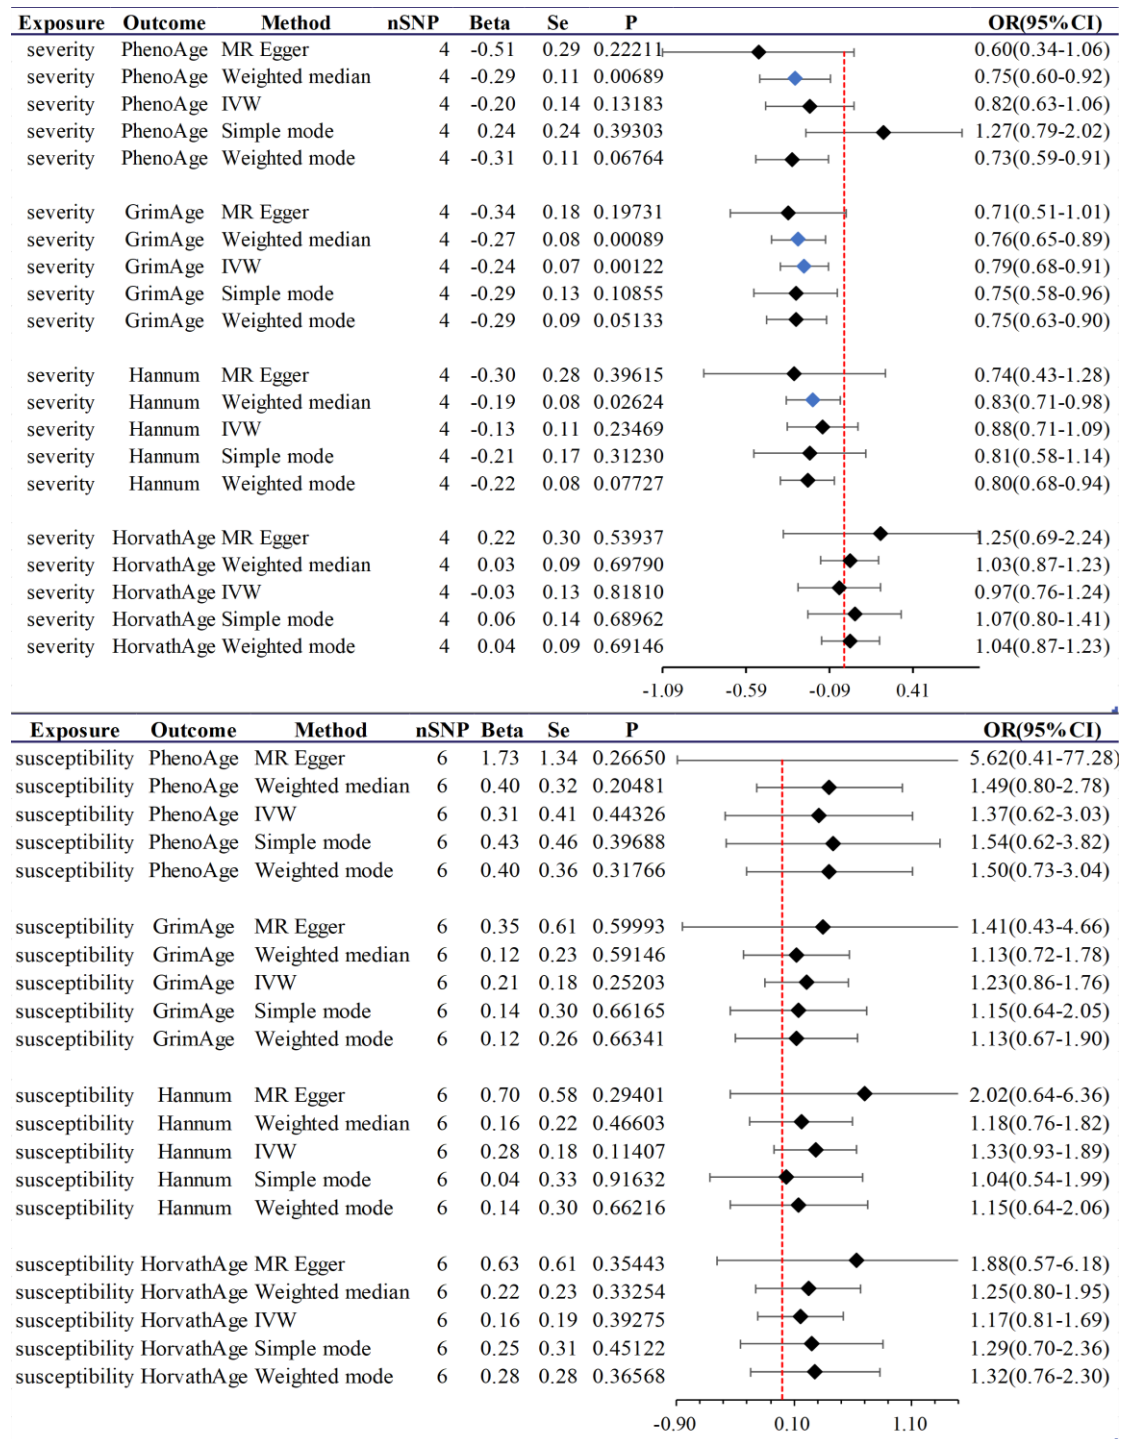

\*Methods: MR Egger、Weighted median、IVW、Simple mode、Weighted mode; Beta: risk index; Se: standard error; P: P-value; OR(95%CI):odds ratio(95%confidence interval); Forest plot: Visualize the causal effect of COVID-19 susceptibility and severity on the risk of epigenetic age by five methods(The standard line is the line of “X=0” (red dashed line)), The blue marker dot is a positive result of P<0.05). Epigenetic age is not a dichotomic variable, so the beta is used as a reference indicator. Beta > 0 indicates this effect allele increases the stroke risk. Otherwise, it reduces the stroke risk (Beta < 0)

**Supplementary Figure 4.** Mendelian randomization effects forest plots for individual SNPs with COVID-19 susceptibility and severity as exposure and epigenetic age as the outcome

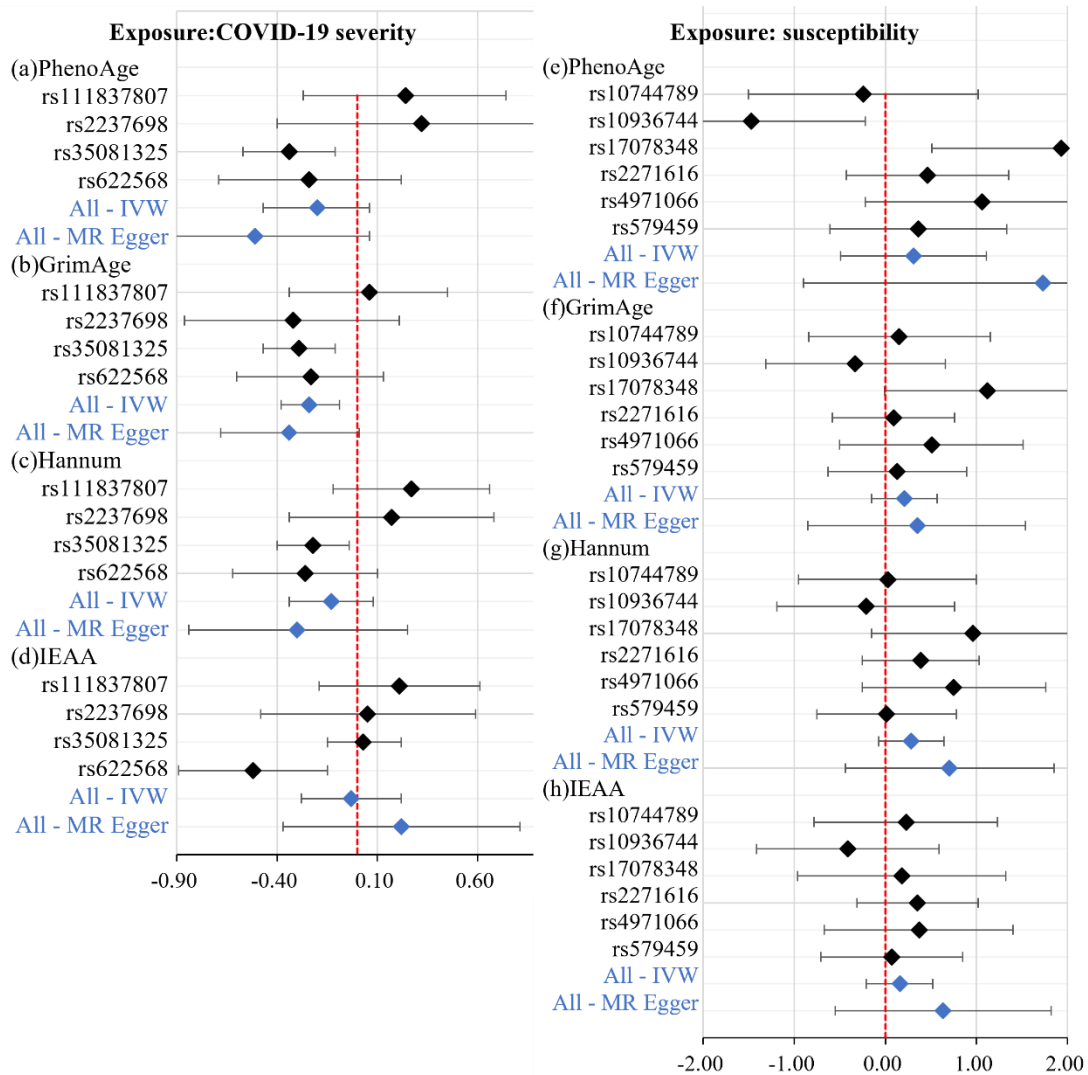

\* This figure showed the forest plots for individual SNPs with COVID-19 susceptibility and severity as the exposure, epigenetic age as the outcome. (a)exposure: susceptibility, outcome: PhenoAge; (b)exposure: susceptibility, outcome: GrimAge; (c)exposure: susceptibility, outcome: Hannum; (d)exposure: susceptibility, outcome: HorvathAge; (e)exposure: severity, outcome: PhenoAge; (f)exposure: severity, outcome: GrimAge; (g)exposure: severity, outcome: HannumAge; (h)exposure: severity, outcome: HorvathAge; The blue marker points indicated All-IVW and All-MR Egger

**Supplementary Figure 5.** OR estimates and 95% CI of the five methods with telomere length as the outcome of exposure, COVID-19 susceptibility and severity

| Exposure        | Outcome        | Method          | nSNP | Beta  | Se   | P       |  | OR(95%CI)       |
|-----------------|----------------|-----------------|------|-------|------|---------|--|-----------------|
| telomere length | severity       | MR Egger        | 48   | -0.19 | 0.35 | 0.58796 |  | 0.83(0.42-1.63) |
| telomere length | severity       | Weighted median | 48   | -0.31 | 0.30 | 0.31311 |  | 0.74(0.41-1.33) |
| telomere length | severity       | IVW             | 48   | -0.03 | 0.20 | 0.85873 |  | 0.97(0.66-1.42) |
| telomere length | severity       | Simple mode     | 48   | -0.52 | 0.57 | 0.36465 |  | 0.60(0.20-1.81) |
| telomere length | severity       | Weighted mode   | 48   | -0.30 | 0.29 | 0.31907 |  | 0.74(0.42-1.32) |
| telomere length | susceptibility | MR Egger        | 102  | 0.06  | 0.09 | 0.47404 |  | 1.07(0.90-1.27) |
| telomere length | susceptibility | Weighted median | 102  | 0.03  | 0.08 | 0.73635 |  | 1.03(0.88-1.20) |
| telomere length | susceptibility | IVW             | 102  | 0.00  | 0.05 | 0.93182 |  | 1.00(0.91-1.11) |
| telomere length | susceptibility | Simple mode     | 102  | 0.13  | 0.16 | 0.41020 |  | 1.14(0.84-1.56) |
| telomere length | susceptibility | Weighted mode   | 102  | 0.03  | 0.08 | 0.75842 |  | 1.03(0.87-1.21) |

\*Methods: MR Egger、Weighted median、IVW、Simple mode、Weighted mode; Beta: risk index; Se: standard error; P: P-value; OR(95%CI):odds ratio(95%confidence interval); Forest plot: Visualize the causal effect of telomere length on the risk of COVID-19 susceptibility and severity by five methods(The standard line is the line of “X=1” (red dashed line))

**Supplementary Figure 6.** Mendelian randomization effects forest plots for individual SNPs with COVID-19 susceptibility and severity as the exposure and telomere length as the outcome

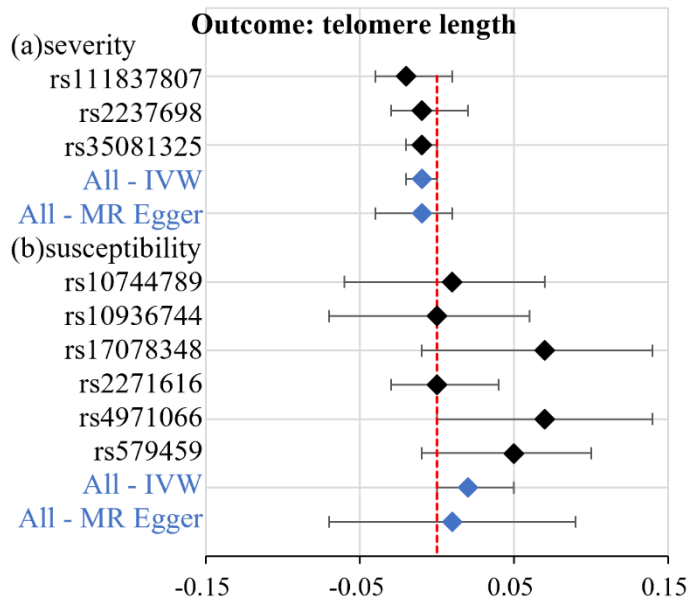

\* This figure showed the forest plots for individual SNPs with COVID-19 susceptibility and severity as the exposure, telomere length as the outcome. (a)exposure: severity, outcome: telomere length; (b)exposure: susceptibility, outcome: telomere length; The blue marker points indicated All-IVW and All-MR Egger

**Supplementary Figure 7.** OR estimates and 95% CI of the five methods with COVID-19 susceptibility and severity as the exposure and telomere length as the outcome

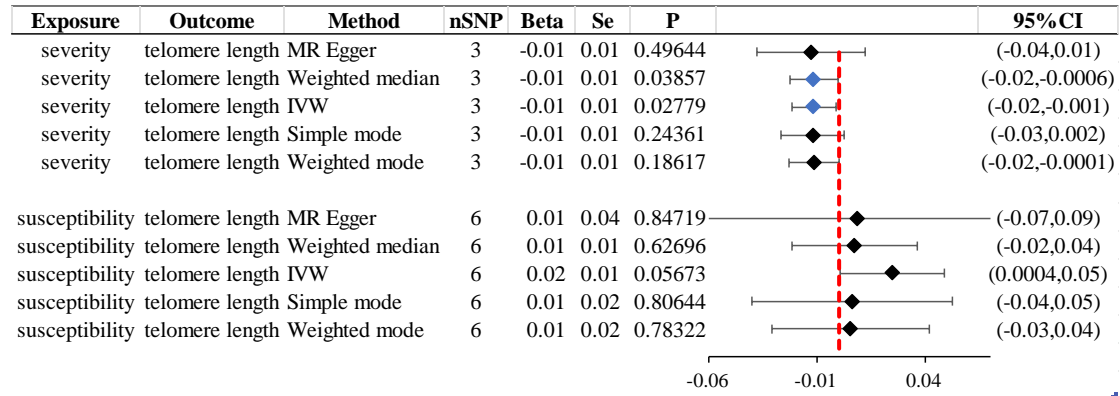

\*Methods: MR Egger、Weighted median、IVW、Simple mode、Weighted mode; Beta: risk index; Se: standard error; P: P-value; 95%CI: 95%confidence interval of beta; Forest plot: Visualize causal effect of COVID-19 susceptibility and severity on the risk of telomere length by five methods(The standard line is the line of “X=0” (red dashed line)), The blue marker dot is a positive result of P<0.05). Telomere length is not a dichotomic variable, so the beta is used as a reference indicator.

**Supplementary Figure 8. MR leave-one-out sensitivity analysis 'exposure' on 'telomere length'**

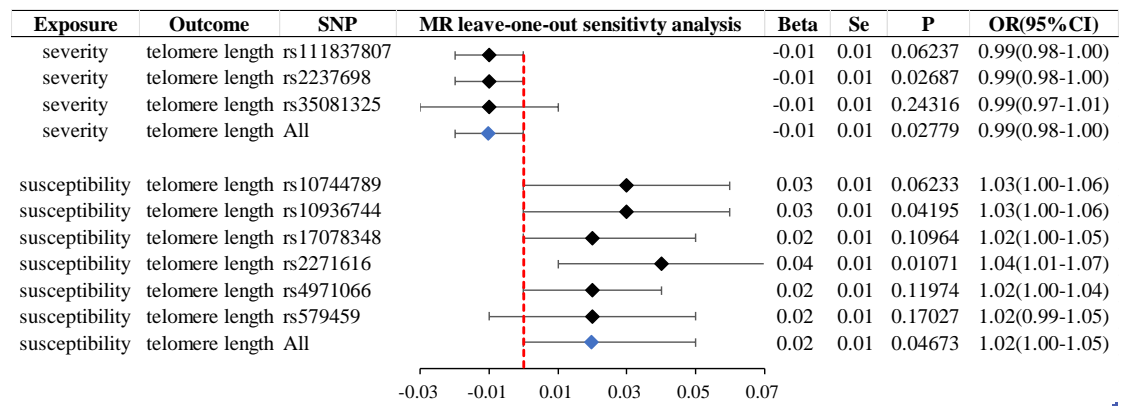

\*“Leave-one-out” plot to visualize the causal effect of COVID19 severity and susceptibility on the risk of telomere length when leaving one SNP out.

**Supplementary Figure 9.** Funnel plots of aging and COVID-19 susceptibility and severity

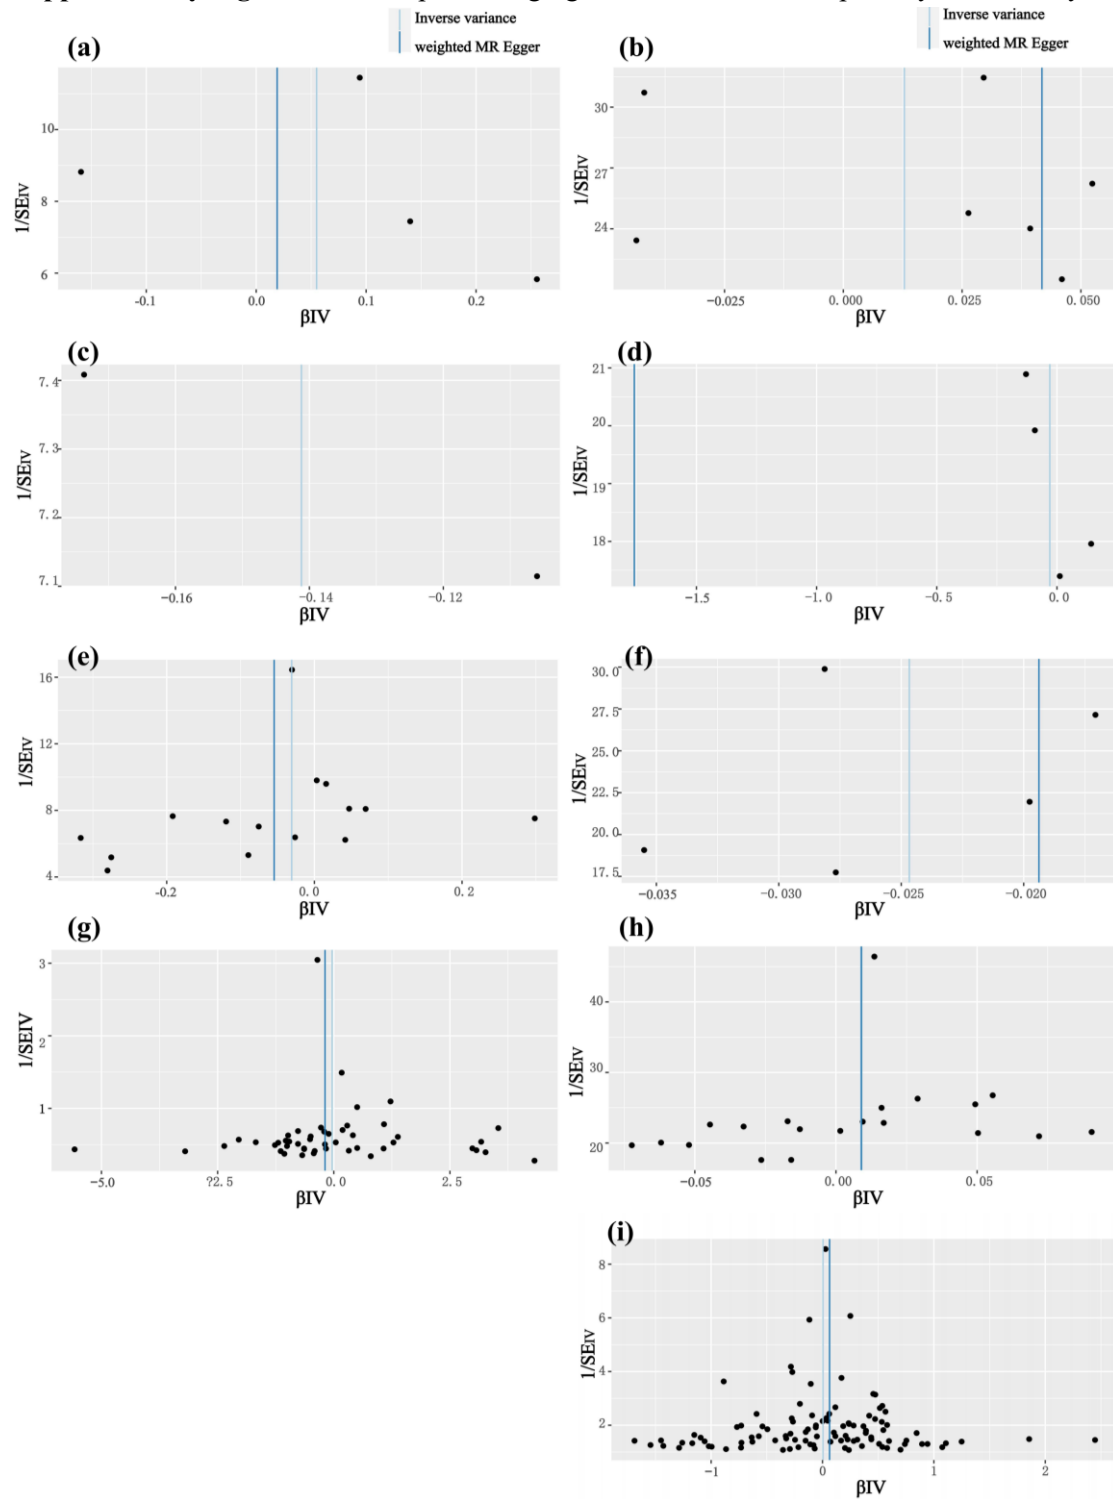

Horizontal ordinate: beta value of the instrumental variables; Vertical coordinates:  $1/SE$  ( $SE$ : Standard Error) of the instrumental variables. (a)exposure: PhenoAge, outcome: severity; (b)exposure: PhenoAge, outcome: susceptibility; (c)exposure: GrimAge, outcome: severity; (d)exposure: GrimAge, outcome: susceptibility; (e)exposure: HorvathAge, outcome: severity; (f)exposure: HannumAge, outcome: susceptibility; (g)exposure: telomere length, outcome: severity; (h)exposure: HorvathAge, outcome: susceptibility; (i)exposure: telomere length, outcome: susceptibility.



**Supplementary Figure 10.** Funnel plots of COVID-19 susceptibility and severity and aging

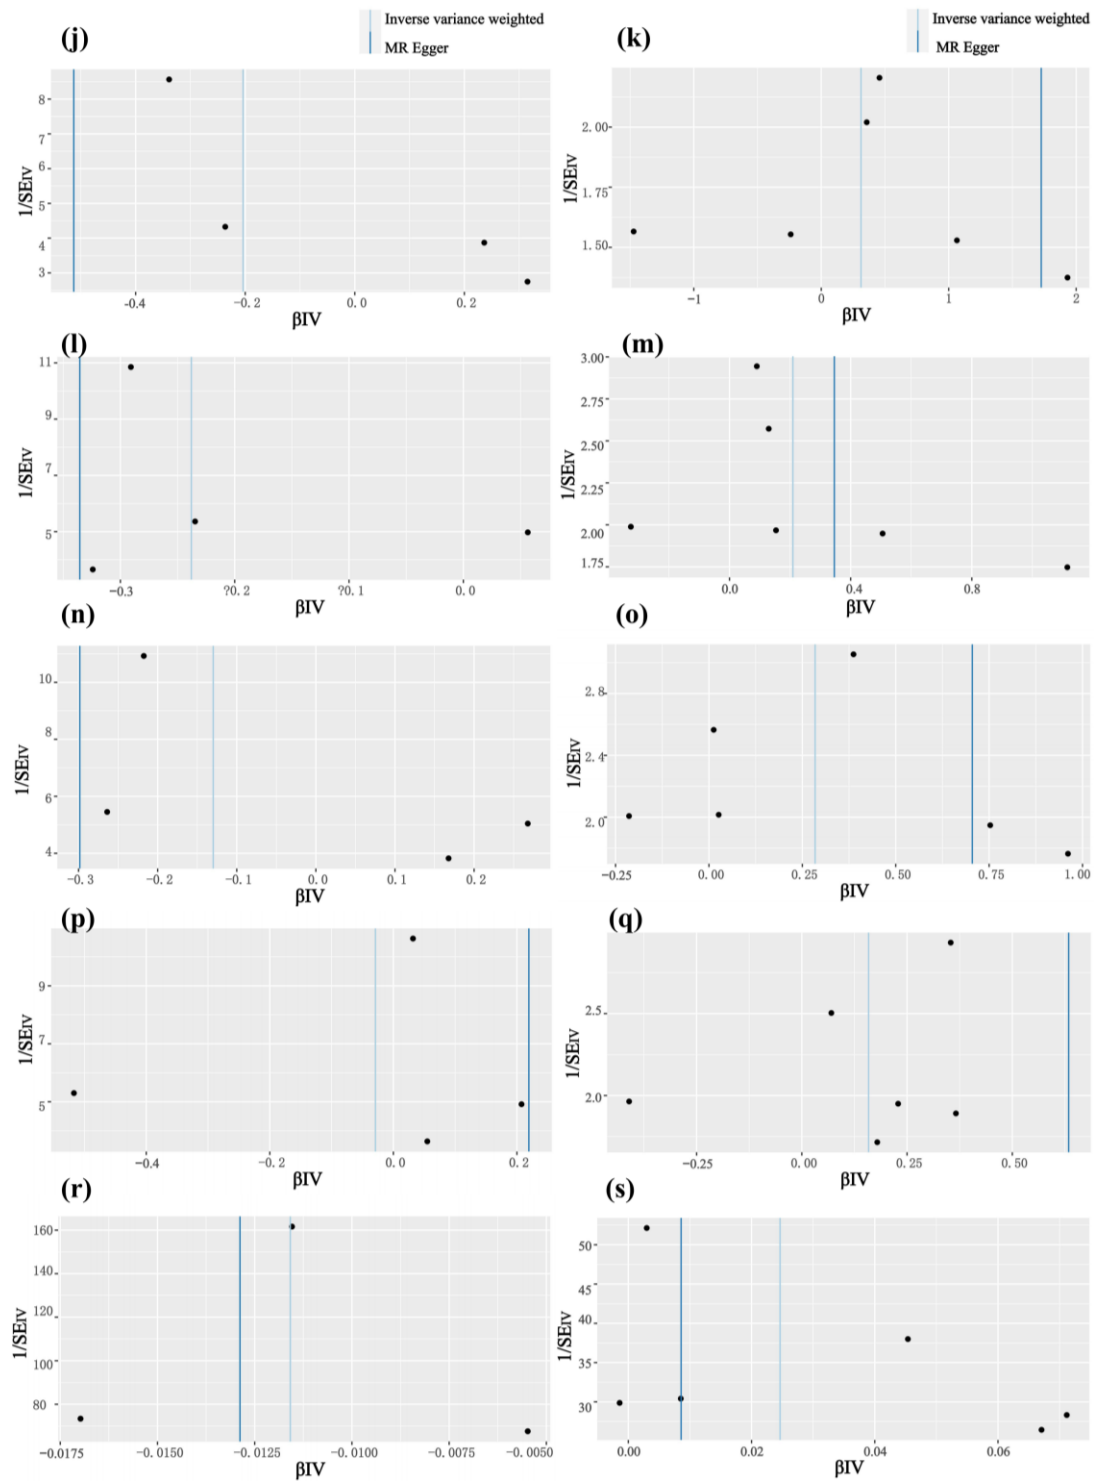

Horizontal ordinate: beta value of the instrumental variables; Vertical coordinates: 1/SE (SE: Standard Error) of the instrumental variables. (j)exposure: severity, outcome: PhenoAge; (k)exposure: susceptibility, outcome: PhenoAge; (l)exposure: severity, outcome: GrimAge; (m)exposure: susceptibility, outcome: GrimAge; (n)exposure: severity, outcome: HannumAge; (o)exposure: susceptibility, outcome: HannumAge; (p)exposure: severity, outcome: HorvathAge; (q)exposure: susceptibility, outcome: HorvathAge; (r)exposure: severity, outcome: telomere length; (s)exposure: susceptibility, outcome: telomere length.
